# Supplementary material for: Impact of Genetic Diagnosis on the Outcome of Hematopoietic Stem Cell Transplant in Primary Immunodeficiency Disorders
Source: Research Square preprint supplement (doi:10.21203/rs.3.rs-1463664/v1), 2022-04-07
Supplement: Supplementary file 1 [file 6a3789329b54f9063db90079.docx]

**TITLE:** Impact of Genetic Diagnosis on the Outcome of Hematopoietic Stem Cell Transplant in Primary Immunodeficiency Disorders

**AUTHORS:** Federica Forlanini, MD1, 2, Alice Chan, MD, PhD1, Jasmeen Dara, MD1, Christopher C. Dvorak, MD1, Morton J. Cowan, MD1, Jennifer M. Puck, MD1, Morna J. Dorsey, MD, MMSc1

1. Division of Pediatric Allergy, Immunology & Bone Marrow Transplantation, UCSF Benioff Children's Hospital, University of California, San Francisco

2. Department of Pediatrics, V. Buzzi Hospital, Università degli Studi di Milano, Italy

Morna J, Dorsey, MD, MMSc

[Morna.dorsey@ucsf.edu](mailto:Morna.dorsey@ucsf.edu)

014154763086

| **Table S3: Classification of Predominant Hematopoietic Cell (HC) vs Combined HC and non-HC Immune Dysfunction Genes** |
| --- |
| **Combined HC and non-HC Immune Dysfunction Genes:** |
| *RAB27A, UNC13D, NFKB1A, STAT3* GOF*, WASP, RMRP, XIAP, TINF2, C1QB, ADA, DCLRE1C, ELANE, JAK3* |
| **Predominant HC Immune Dysfunction Genes:** |
| *ZAP70, CD40L, IL7R, IL2RG, RAG1, RAG2, FOXP3, SH2D1A, PRF1, CYBB, PI3KCD, MALT1, IL10RA* |
